# Supplementary material for: Effect of soybean insoluble dietary fiber on prevention of obesity in high-fat diet fed mice via regulation of the gut microbiota
Source: Royal Society of Chemistry journal article supplement (doi:10.1039/d1fo00078k), 2021-01-01
Supplement: d1fo00078k1.pdf [file d1fo00078k1.pdf]

## Supplementary material

**Fig. S1** Short-chain fatty acids standard chromatograms

**Fig. S2** Heatmap of the mice gut microbiota in species level

**Fig. S3** Correlation analysis at order classification level

**Fig. S4** Correlation analysis at family classification level

**Fig. S5** Correlation analysis at genus classification level

**Fig. S6** Correlation analysis at species classification level

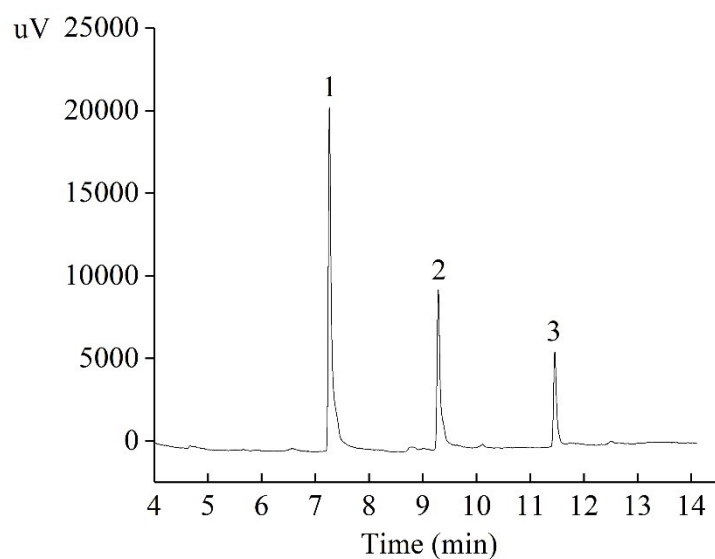

**Fig. S1** Short-chain fatty acids standard chromatograms

1: Acetic acid, 7.201 min; 2: Propionic acid, 9.217 min, 3: Butyric acid, 11.392 min. Fecal short-chain fatty acids were measured using 2010 plus gas chromatography equipped with a flame ionization detector (FID) and a Nukol capillaries column (30 m  $\times$  0.32 mm  $\times$  0.25  $\mu$ m). The temperature of injection port and detector were 220  $^{\circ}$ C and 250  $^{\circ}$ C. The initial oven temperature was 60  $^{\circ}$ C, then increased to 190  $^{\circ}$ C at a rate of 20  $^{\circ}$ C/min and maintained for 3 min. Split ratio was 20:1. The nitrogen, hydrogen and air were used as carrier gas at a flow rate of 75 mL/min, 70 mL/min and 50 mL/min. The injection volume was 1  $\mu$ L.

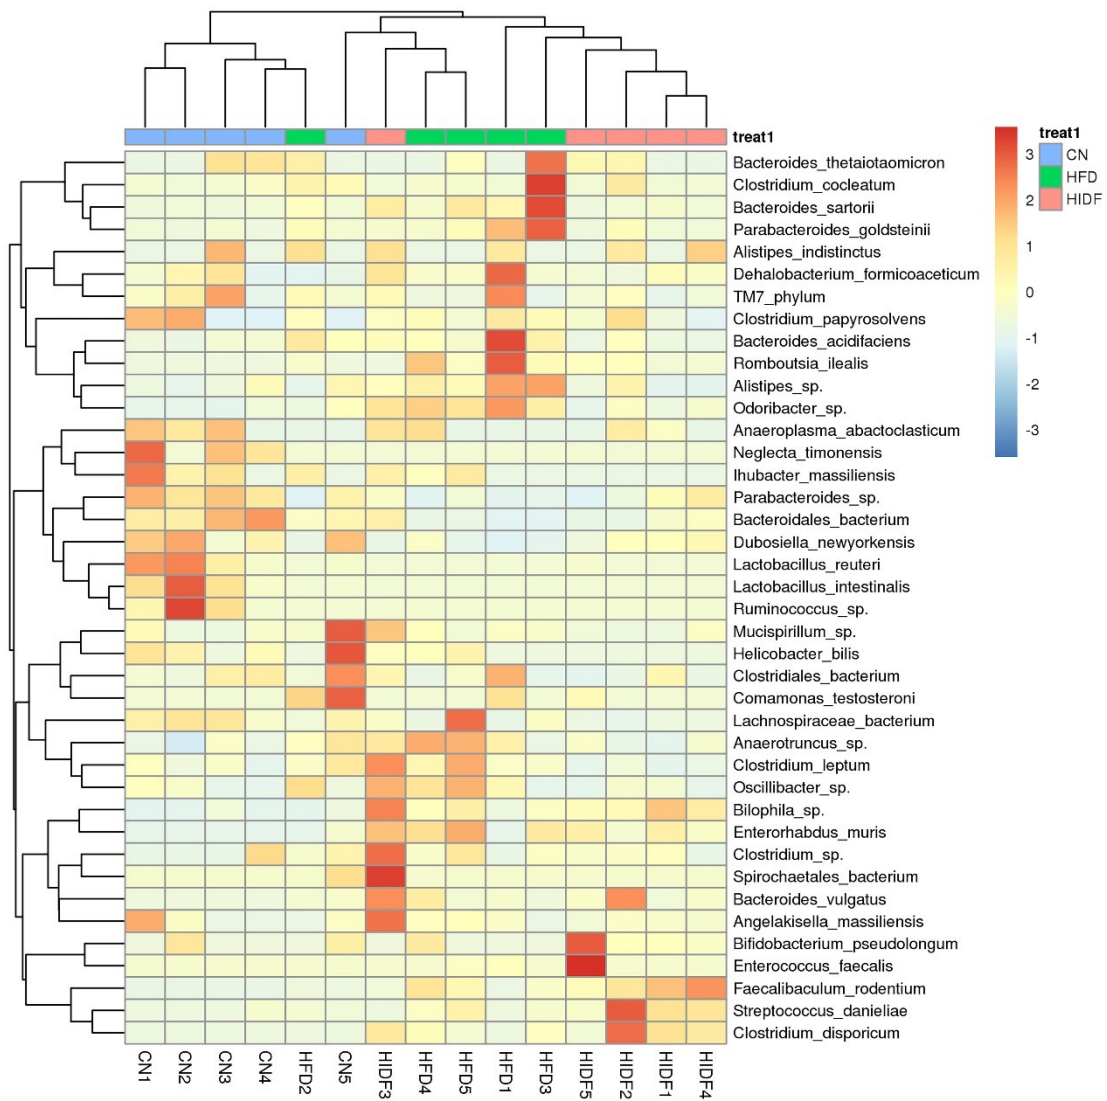

**Fig. S2** Heatmap of the mice gut microbiota in species level

CN: Control, HFD: High-fat diet, H1DF: High-does insoluble dietary fiber.

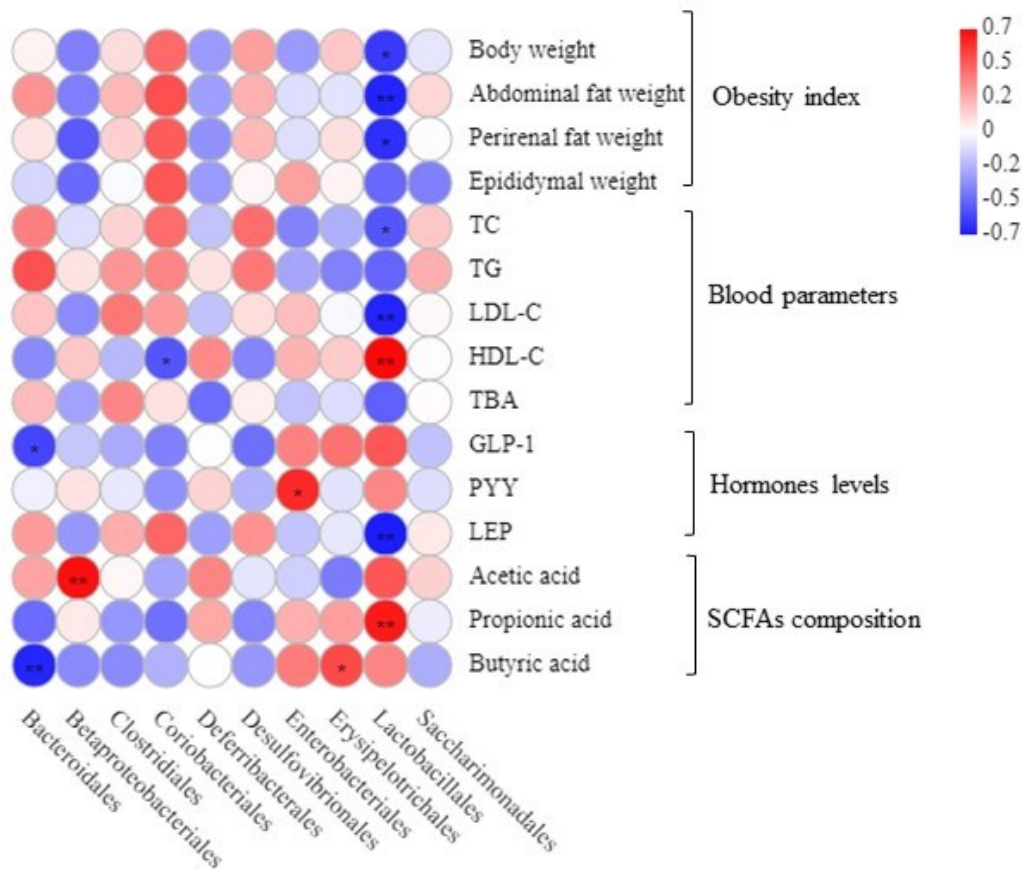

**Fig. S3** Correlation analysis at order classification level

\*  $p < 0.05$ , \*\*  $p < 0.01$ , \*\*\*  $p < 0.001$ .

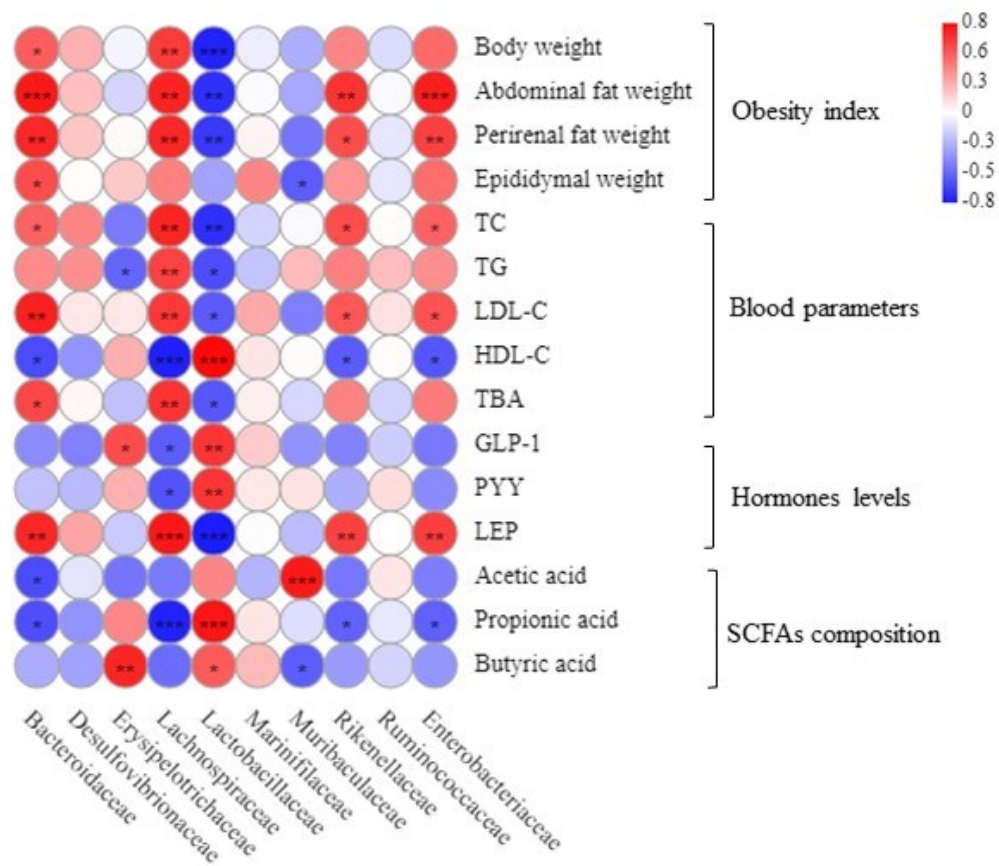

**Fig. S4** Correlation analysis at family classification level

\*  $p < 0.05$ , \*\*  $p < 0.01$ , \*\*\*  $p < 0.001$ .

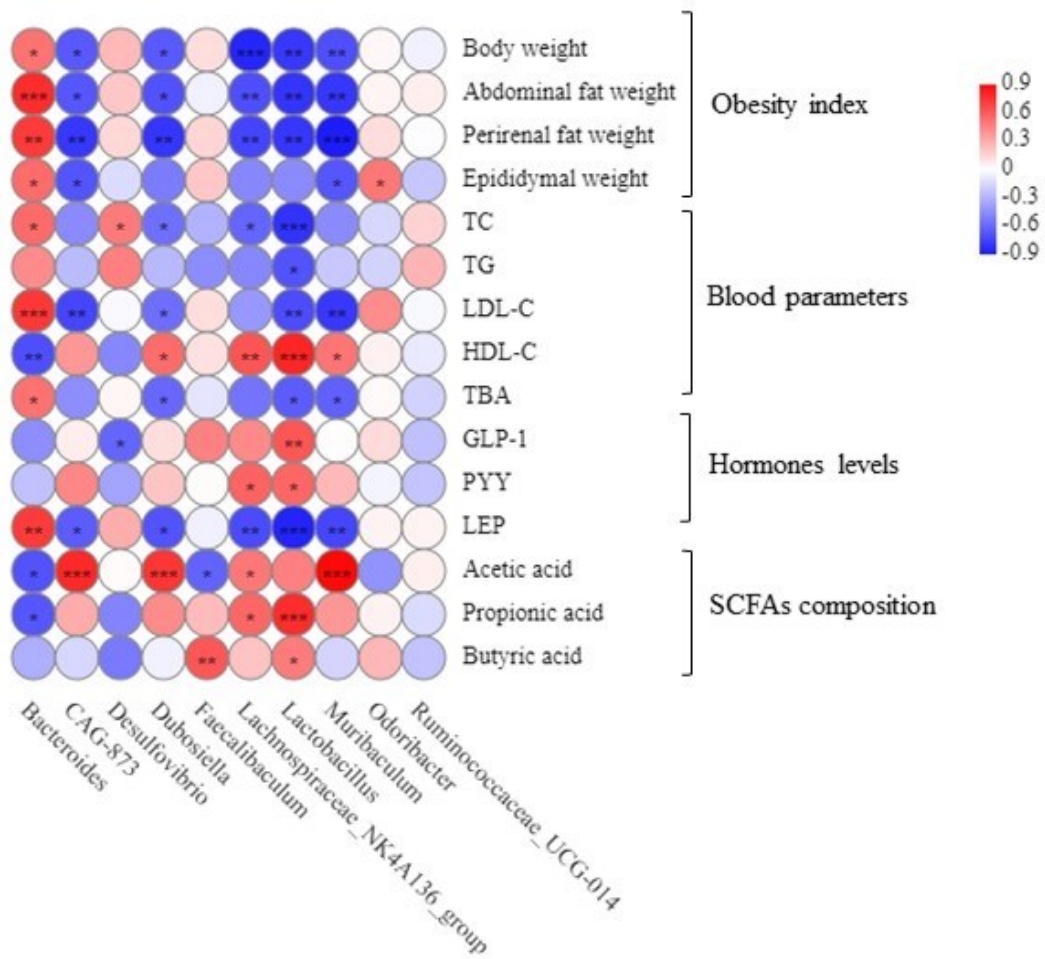

**Fig. S5** Correlation analysis at genus classification level

\*  $p < 0.05$ , \*\*  $p < 0.01$ , \*\*\*  $p < 0.001$ .

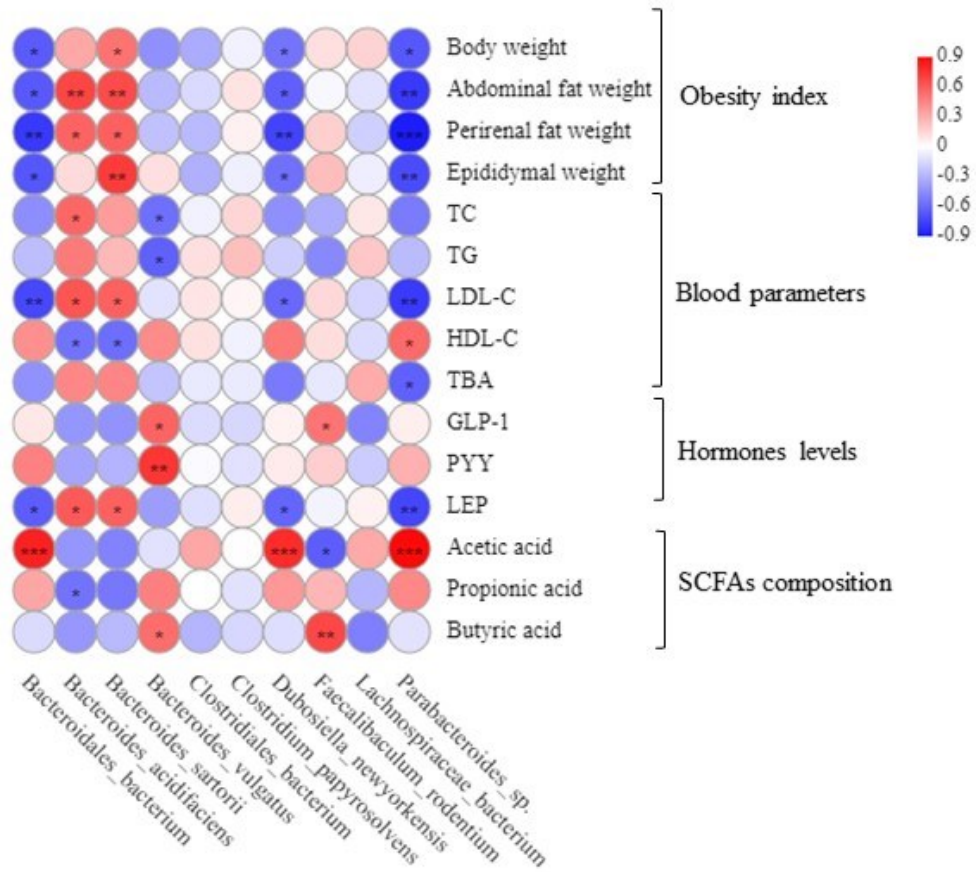

**Fig. S6** Correlation analysis at species classification level  
 \*  $p < 0.05$ , \*\*  $p < 0.01$ , \*\*\*  $p < 0.001$ .
